# Supplementary material for: Small-scale variation of snow in a regional permafrost model
Source: Copernicus journal article supplement (doi:10.5194/tc-10-1201-2016), 2016-06-03
Supplement: Supplementary file 1 [file tc-10-1201-2016-supplement.zip]

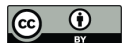

## *Supplement of*

# **Small-scale variation of snow in a regional permafrost model**

**K. Gisnås et al.**

*Correspondence to:* Kjersti Gisnås ([kjersti.gisnas@geo.uio.no](mailto:kjersti.gisnas@geo.uio.no))

- [tc-10-1201-2016-supplement-title-page.pdf](#)
- [SupplementaryTables](#)
  - [TableS1.docx](#)
  - [TableS2.docx](#)

The copyright of individual parts of the supplement might differ from the CC-BY 3.0 licence.
